# Supplementary material for: The K898E germline variant in the PP1-binding motif of BRCA1 causes defects in DNA Repair
Source: PubMed Central journal article supplement — Sci Rep. 2014 Jul 24;4:5812. doi: 10.1038/srep05812 (PMC4108927; doi:10.1038/srep05812), 2014-07-24
Supplement: srep05812-s1.pdf [file srep05812-s1.pdf]

## Supplementary Information

**Title: The K898E germline variant in the PP1-binding motif of BRCA1 causes defects in DNA Repair**

Bert Yu-Hung Chen<sup>1</sup>, Cheng-Hsiang Huang<sup>1</sup>, Ying-Hsi Lin<sup>1</sup>, Ching-Chun Huang<sup>1</sup>,

Chu-Xia Deng<sup>2</sup> and Lih-Ching Hsu<sup>1\*</sup>

<sup>1</sup> School of Pharmacy, College of Medicine, National Taiwan University, Taipei 10050, Taiwan, ROC

<sup>2</sup> Genetics of Development and Diseases Branch, National Institute of Diabetes, Digestive, and Kidney Diseases, National Institutes of Health, Bethesda, MD 20892,

USA

\*Corresponding Author: Lih-Ching Hsu, Ph.D.

School of Pharmacy, College of Medicine, National Taiwan University, No. 33,

Linsen S. Road, Taipei 10050, Taiwan, ROC. Tel: +886-2-3366-8759, Fax:

+886-2-2391-9098. E-mail: [lhsu@ntu.edu.tw](mailto:lhsu@ntu.edu.tw)

## Supplementary Figures and Figure Legends

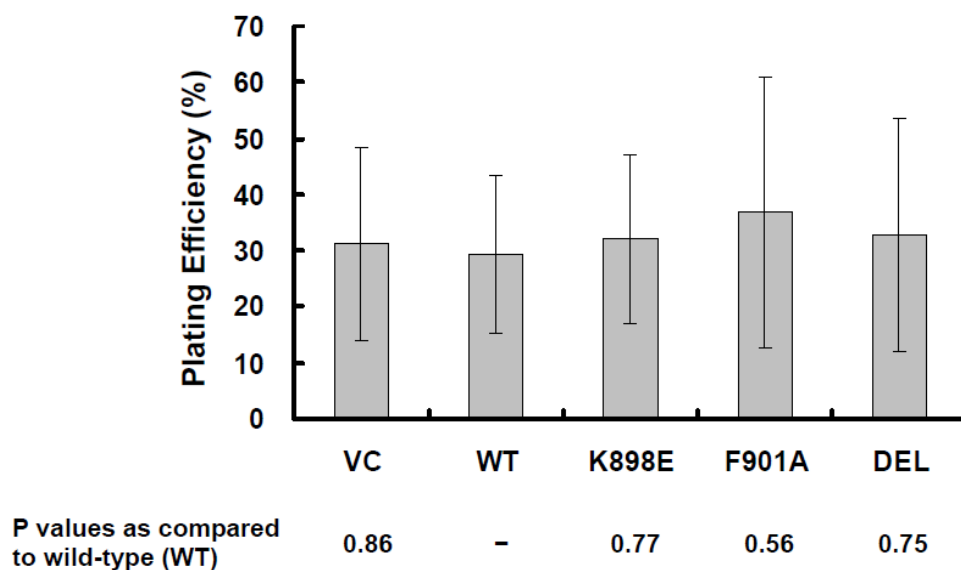

Supplementary Figure S1. No differences in cell growth were observed between 780 cells transfected with vector control (VC), variant BRCA1 (K898E, F901A, or DEL), or wild-type BRCA1 (WT), as shown by plating efficiency. For the control samples in cell survival (colony formation) assays, 500 transfected 780 cells were plated to T25 flasks in triplicate, and were allowed to grow and form colonies for 10-12 days without undergoing irradiation. Plating efficiency was then derived by fixing and counting the colonies present and dividing colony numbers by the original number of plated cells (500). The mean plating efficiencies (mean  $\pm$  SD of five independent experiments) of all transfectants were similar, and *P* values derived from a paired, two-tailed t-test did not indicate any significant differences between wild-type BRCA1 transfectants and variant BRCA1 transfectants or vector controls (from five independent experiments). The results show that no major differences in cell survival, cell growth, or the cell cycle were detected in transfectants, even after an extended period of culturing.

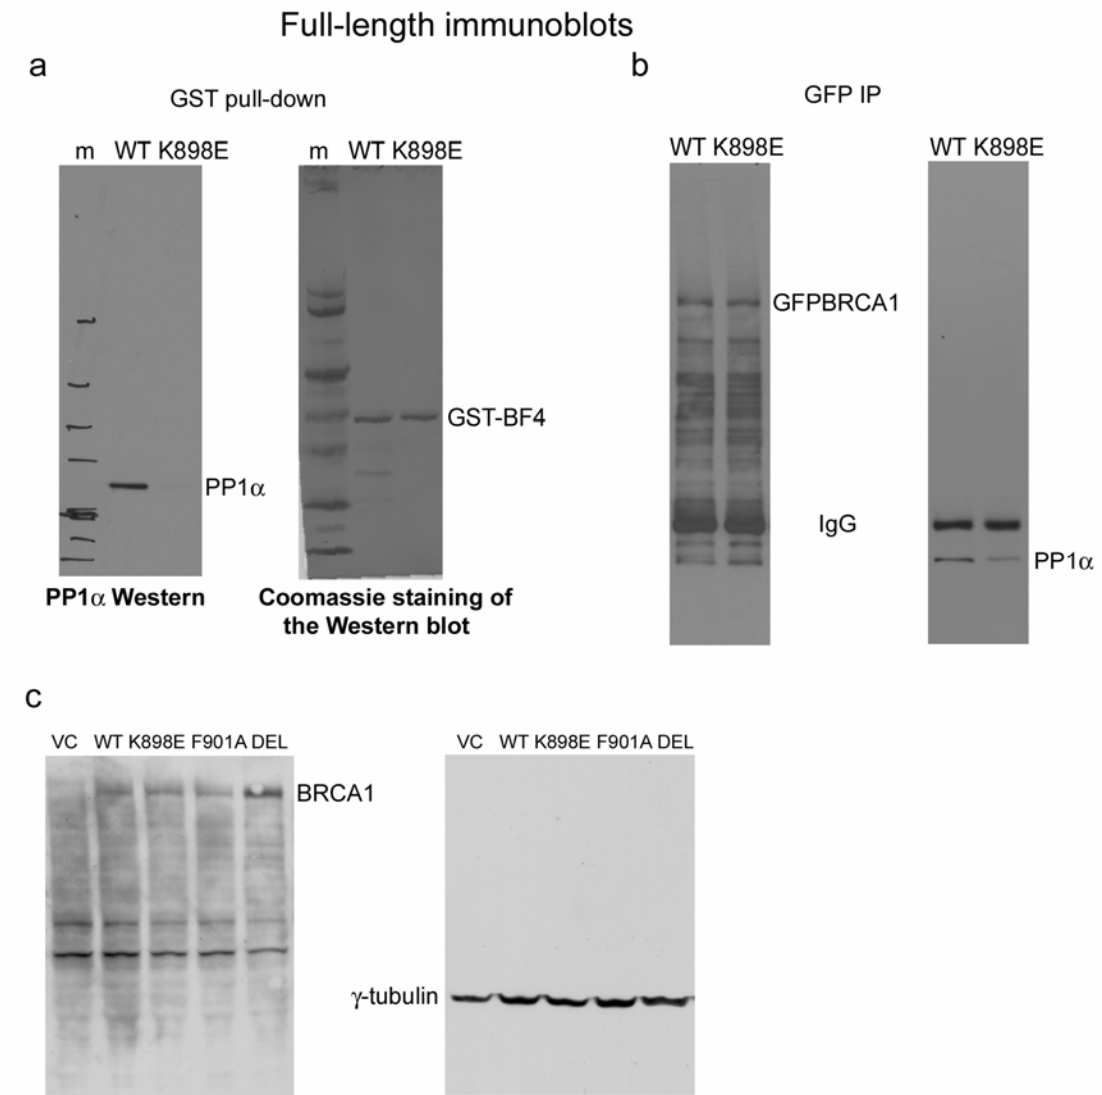

Supplementary Figure S2. Full-length immunoblots of data shown in Figure 1 (a, b) and Figure 2a (c).
